# Supplementary material for: Thomasclavelia ramosa and Alcohol-Related Hepatocellular Carcinoma: A Microbial Culturomics Study
Source: Research Square preprint supplement (doi:10.21203/rs.3.rs-5053117/v1), 2025-04-03
Supplement: Supplementary file 1 [file f61fb5cdc4aecb5ba1e6bb6f.docx]

***Thomasclavelia ramosa* and Alcohol-Related Hepatocellular Carcinoma: A Microbial Culturomics Study**

Reham MAGDY WASFY, Anissa ABDOULAYE, Patrick BORENTAIN, Babacar MBAYE, Maryam TIDJANI ALOU, Aurelia CAPUTO, Claudia ANDRIEU¸ Giovanna MOTTOLA, Anthony LEVASSEUR, Matthieu MILLION,Rene GEROLAMI

**SUPPLEMENTARY DATA**

**SUPPLEMENTARY METHODS**

**Study Population**

The HEPATGUT study is a case-control study focusing on gut microbiota alteration in hepatic diseases. Previously published results focused on HBV (1) and MASH (2, 3). The present study included 35 patients with ALD and 24 controls (CTL). All 59 provided a fecal sample analyzed using 16S rRNA sequencing, and 21 were analyzed by culturomics (11 ALD and 10 CTL). This is explained by the fact that the workload is much higher for culturomics (6 weeks per sample) than for 16S rRNA sequencing. Healthy controls without chronic diseases or on regular medications were recruited. Age, gender, weight, height, and alcohol consumption were collected. Patients with ALD were diagnosed according to the European Association for the Study of the Liver (EASL) guidelines (4).

The main exclusion criteria were probiotics/antibiotics intake in the previous month before the collection of stools, participants under 18 years old, and pregnancy. To clarify gut microbiota signature according to HCC, we divided the ALD group into ALD without HCC (ALD-NoHCC) and ALD with HCC (ALD-HCC). The diagnosis of HCC was made according to the EASL guidelines (5). Controls (CTL) were recruited as previously reported (1, 2). The groups were matched with age and body mass index (BMI).

**Asymptomatic controls**

In a pragmatic approach, controls were asymptomatic individuals without notable medical history without known metabolic syndrome, HBV infection and alcoholism and considered at very low risk of liver disease. No ultrasound or biological data were obtained for ethical reasons.

**Alcohol consumption**

At time of inclusion, 14 ALD patients were still drinking more than 20 g alcohol per day, 5 patients in HCC group (26%) and 9 patients in the non-HCC group (26%). In the control group, 8 patients reported alcohol consumption. All were drinking less no more than 20 g alcohol per day.

**Hepatocellular carcinoma**

Hepatocellular (HCC) diagnosis was performed according the American Association for the Study of Liver Diseases (AASLD) guidelines and patients were classified according to the BCLC classification (6). At time of inclusion, patients were classified as Barcelona Clinic Liver Cancer prognosis and treatment strategy into BCLC A (n=5), BCLC B (n=4), and BCLC C (n=10) (7). All patients but one harbored cirrhosis. Histological diagnosis was available for four patients, including patients without cirrhosis. None of the patients were treated by immunotherapy at the time of inclusion.

**Study Design and ethics statement**

A case-control study was carried out in the Hepatology Department of Marseille University Hospital (south-eastern France), Marseille, France, according to STROBE statement guidelines (8) from January to June 2022. The HEPATGUT study was approved by the local ethics committee of the Institut Hospitalo-Universitaire Méditerranée Infection, Marseille, France (IHUMI, 2020-004), approved by the Protection of Persons Committee (Approval No. CPP: 21.04391.000046—21075), and carried out according to the 2013 Declaration of Helsinki (World Medical Association, 2013) (9). Patient consent (non-opposition) was obtained according to French regulations.

**Clinical measurements**

Liver stiffness measurements in cirrhotic patients were conducted using a FibroScan® instrument (Echosens, Paris, France). Measurements with more than ten successful acquisitions were obtained (with a rate of > 60% and an interquartile range of < 30%). In addition, routine biochemistry, including prothrombin index (PT), platelets count (PLT), total bilirubin (TBIL), serum albumin (ALB), alanine aminotransferase (ALT), aspartate aminotransferase (AST), gamma-glutamyl transferase (GGT), alkaline phosphatase (ALP) and serum creatinine, were measured. The fecal samples from all participants were collected and stored at - 80° C until used, as described in our previous study (1).

**Microbial culturomics**

Microbial culturomics is a new -omics strategy developed in our center as a high-throughput culture method based on Matrix-Assisted Laser Desorption Ionization Time-Of-Flight Mass Spectrometry (MALDI-TOF MS) and diversified physicochemical culture conditions mimicking the natural microenvironment (10), able to identify several new species (11) and complementary to metagenomics (12). MALDI-TOF MS can identify hundreds of colonies per hour with unprecedented microbial taxonomic accuracy (13). Several teams have successfully reproduced this approach to explore the human microbiota composition (14), notably by illuminating the metagenomic microbial dark matter (15). Culturomics has the unparalleled advantage of ascertaining viable microbial strains. In contrast, metagenomics and sequencing approaches may have the 'running after ghosts' bias, i.e., identify only DNA sequences unrelated to viable bacteria (16). Furthermore, our findings demonstrated that this microbial culturomics complements metagenomics when assessing a dysbiotic signature in a clinical context (severe acute malnutrition (17), necrotizing enterocolitis (18), and HIV (19)).

Twenty-one stool samples (11 samples from patients with ALD and ten samples from controls) were cultured according to the culturomics approach previously established in our laboratory (12) This number of samples was chosen because microbial culturomics is a time-consuming approach. A full-time person takes approximately six weeks to analyze each sample. In addition, the culturomics study is intended to be an exploratory study to gain insights into cultured microbiota in patients with ALD and HCC. Fast culturomics was applied using four culture conditions, as Naud et al. (20) comprehensively detailed. We applied the same culturomics methodology described in our previous study (1). A subculture of the isolated colonies was performed for purification. The colonies were then identified using MALDI-TOF MS (Bruker Daltonics, Bremen, Germany) according to the manufacturer's instruction (13).

**16S rDNA gene sequencing**

PCR amplification of the bacterial 16S rRNA gene V3-V4 region was performed using primers (FwOvAd_341F:5'TCGTCGGCAGCGTCAGATGTGTATAAGAGACAGCCTACGGGNGGCWGCAG3'; RevOvAd_785R:5'GTCTCGTGGGCTCGGAGATGTGTATAAGAGACAGGACTACHVGGGTATCTAATCC3') with a Illumina MiSeq engine as being described in details in our previous study (1).

**Bioinformatics analysis**

The raw sequencing data for all samples were deposited into the NCBI Sequence Read Archive database (https://www.ncbi.nlm.nih.gov/bioproject/?term=PRJEB62828). Noisy sequencing data were excluded, and chimeric sequences were identified and removed by Chimera Slayer. The clean data were clustered into operational taxonomic units (OTUs) at the 97% similarity threshold using the UCLUST algorithm after the removal of singletons. The alpha and beta diversity were calculated using the MicrobiomeAnalyst database (https://www.microbiomeanalyst.ca/; Accessed on 30 September 2023) based on the profile of the relative abundance of OTUs in a single sample. Alpha diversity was evaluated through three indexes (Chao1, Simpson, and Shannon) to compare bacterial richness and diversity across samples. Principal Coordinates analysis (PCoA) was conducted using Bray-Curtis dissimilarity to visualize the microbial structure and distribution among the samples. Permutational multivariate analysis of variance (PERMANOVA) was used to assess beta diversity. Linear discriminant analysis (LDA) effect size (LEfSe) used the Kruskal-Wallis rank sum test combined with LDA to detect features with significantly different abundances of various taxa among groups was done with the Microbiome Analyst Platform (https://www.microbiomeanalyst.ca/; Accessed 30 September 2023). A log LDA score >2 was the threshold for discriminating between groups.

**Statistical analysis**

Normal distribution was determined using either D'Agostino-Pearson or the Kolmogorov-Smirnov test. One-way analysis of variance was performed to compare continuous variables between two groups. Differences between groups were determined by using the non-parametric Kruskal-Wallis and Mann-Whitney U test. Spearman rank correlation was used to calculate the relationship between microbial makers and clinical indicators. The two-sided Fisher's exact test was used for significant detection frequency difference. All statistical analyses were calculated using GraphPad Prism Software for Windows (GraphPad Software, San Diego, CA, USA) (version 9.0). P values less than 0.05 were considered significant differences.

**SUPPLEMENTARY RESULTS**

***Characteristics of the study participants***

After a strict inclusion and exclusion process, 59 participants were enrolled in our study, including 35 patients with ALD and 24 controls. The ALD group was subdivided into ALD without HCC (ALD-NoHCC, n=16) and with HCC (ALD-HCC, n=19) (Supplementary Figure 1). The clinical characteristics of the groups are shown in Supplementary Table 1. The three groups were relatively well-balanced in sample size, allowing relevant comparisons. Compared to controls, ALD was associated with male gender, high blood pressure, and smoking, as expected (Supplementary Table 1).

***Four genera associated with ALD by culturomics***

Overall, twenty-one samples were analyzed using microbial culturomics (5 ALD-HCC, 6 ALD-NoHCC, and 10 CTL), allowing the isolation and identification of 32,088 colonies (Table S1). For patients with ALD, 17,308 colonies were isolated and tested using MALDI-TOF MS with an average of 1,573 ± 333 colonies per sample. For control samples, 14,780 colonies were isolated, with an average of 1,478 ± 265 colonies per sample (p = 0.48). Diversity at the species level was found to be increased in the ALD group for four bacterial genera, all belonging to one phylum (*Bacillota*), including *Thomasclavelia* (p = 0.0016), *Enterocloster* (p = 0.0058), *Clostridium* (p = 0.0021) and *Peptoniphilus* (p= 0.0044, Figure 2a).

***Overview of gut microbiota shift in ALD by 16S rDNA sequencing***

The 16S rDNA gene sequencing was performed on the stool samples from all the participants. The sequencing run expressed good-quality monitoring parameters, yielding a total of 4,329,380 reads (1,246,349 for ALD-NoHCC, 1,544,568 for ALD-HCC, and 1,538,463 for the control group) after excluding low-quality reads. On average, each sample had 73,379 ± 54,786 reads. 2,840,773 clean tags were obtained, of which 1,980 OTUs were matched. Of these OTUs, 1,565 (79 %) were successfully assigned at the phylum level, 886 (45 %) at the genus level, and 493 (25 %) at the species level (Table S2). The overall intestinal microbiota structure significantly differed among the ALD-NoHCC, ALD-HCC, and control groups. The Chao1 index (p = 0.037), Simpson index (p = 0.017), and Shannon index (p = 0.0005), which reflect the alpha diversity, were significantly lower in the ALD-NoHCC and ALD-HCC groups compared to the control group. However, no significant difference was noticed in alpha diversity indices between ALD-NoHCC and ALD-HCC groups. PCoA was performed using Bray–Curtis distance, applying pairwise comparison. The ALD-NoHCC and ALD-HCC groups showed a significantly different pattern compared to the control group (PERMANOVA, p = 0.001; F-value= 2.9824; R2=0.0963).

**References**

1. Magdy Wasfy R, Mbaye B, Borentain P, Tidjani Alou M, Murillo Ruiz ML, Caputo A, et al. Ethanol-Producing Enterocloster bolteae Is Enriched in Chronic Hepatitis B-Associated Gut Dysbiosis: A Case-Control Culturomics Study. Microorganisms. 2023;11(10).

2. Mbaye B, Magdy Wasfy R, Borentain P, Tidjani Alou M, Mottola G, Bossi V, et al. Increased fecal ethanol and enriched ethanol-producing gut bacteria Limosilactobacillus fermentum, Enterocloster bolteae, Mediterraneibacter gnavus and Streptococcus mutans in nonalcoholic steatohepatitis. Front Cell Infect Microbiol. 2023;13:1279354.

3. Mbaye B, Borentain P, Magdy Wasfy R, Alou MT, Armstrong N, Mottola G, et al. Endogenous Ethanol and Triglyceride Production by Gut Pichia kudriavzevii, Candida albicans and Candida glabrata Yeasts in Non-Alcoholic Steatohepatitis. Cells. 2022;11(21).

4. EASL clinical practical guidelines: management of alcoholic liver disease. J Hepatol. 2012;57(2):399-420.

5. EASL Clinical Practice Guidelines: Management of hepatocellular carcinoma. J Hepatol. 2018;69(1):182-236.

6. Marrero JA, Kulik LM, Sirlin CB, Zhu AX, Finn RS, Abecassis MM, et al. Diagnosis, Staging, and Management of Hepatocellular Carcinoma: 2018 Practice Guidance by the American Association for the Study of Liver Diseases. Hepatology. 2018;68(2):723-50.

7. Reig M, Forner A, Rimola J, Ferrer-Fàbrega J, Burrel M, Garcia-Criado Á, et al. BCLC strategy for prognosis prediction and treatment recommendation: The 2022 update. J Hepatol. 2022;76(3):681-93.

8. von Elm E, Altman DG, Egger M, Pocock SJ, Gøtzsche PC, Vandenbroucke JP. The Strengthening the Reporting of Observational Studies in Epidemiology (STROBE) statement: guidelines for reporting observational studies. Epidemiology. 2007;18(6):800-4.

9. World Medical Association Declaration of Helsinki: ethical principles for medical research involving human subjects. Jama. 2013;310(20):2191-4.

10. Lagier JC, Armougom F, Million M, Hugon P, Pagnier I, Robert C, et al. Microbial culturomics: paradigm shift in the human gut microbiome study. Clin Microbiol Infect. 2012;18(12):1185-93.

11. Diakite A, Dubourg G, Raoult D. Updating the repertoire of cultured bacteria from the human being. Microb Pathog. 2021;150:104698.

12. Lagier JC, Dubourg G, Million M, Cadoret F, Bilen M, Fenollar F, et al. Culturing the human microbiota and culturomics. Nat Rev Microbiol. 2018;16:540-50.

13. Seng P, Drancourt M, Gouriet F, La Scola B, Fournier PE, Rolain JM, et al. Ongoing revolution in bacteriology: routine identification of bacteria by matrix-assisted laser desorption ionization time-of-flight mass spectrometry. Clin Infect Dis. 2009;49(4):543-51.

14. Huang Y, Sheth RU, Zhao S, Cohen LA, Dabaghi K, Moody T, et al. High-throughput microbial culturomics using automation and machine learning. Nat Biotechnol. 2023;41(10):1424-33.

15. Dickson I. Gut microbiota: Culturomics: illuminating microbial dark matter. Nat Rev Gastroenterol Hepatol. 2017;14(1):3.

16. Bellali S, Lagier JC, Million M, Anani H, Haddad G, Francis R, et al. Running after ghosts: are dead bacteria the dark matter of the human gut microbiota? Gut Microbes. 2021;13(1):1-12.

17. Tidjani Alou M, Million M, Traore SI, Mouelhi D, Khelaifia S, Bachar D, et al. Gut Bacteria Missing in Severe Acute Malnutrition, Can We Identify Potential Probiotics by Culturomics? Front Microbiol. 2017;8:899.

18. Cassir N, Benamar S, Khalil JB, Croce O, Saint-Faust M, Jacquot A, et al. Clostridium butyricum Strains and Dysbiosis Linked to Necrotizing Enterocolitis in Preterm Neonates. Clin Infect Dis. 2015;61(7):1107-15.

19. Dubourg G, Lagier JC, Hüe S, Surenaud M, Bachar D, Robert C, et al. Gut microbiota associated with HIV infection is significantly enriched in bacteria tolerant to oxygen. BMJ Open Gastroenterol. 2016;3(1):e000080.

20. Naud S, Khelaifia S, Mbogning Fonkou MD, Dione N, Lagier JC, Raoult D. Proof of Concept of Culturomics Use of Time of Care. Front Cell Infect Microbiol. 2020;10:524769.

**Supplementary Table 1. Demographic and clinical characteristics of the study participants**

| **Characteristics** | **Controls**  **(n=24)** | **ALD-NoHCC (n=16)** | **ALD-HCC**  **(n=19)** | ***P*1 value** | ***P*2 value** | ***P*3 value** | ***P*4 value** |
| --- | --- | --- | --- | --- | --- | --- | --- |
| Demographic |  |  |  |  |  |  |  |
| Age (years) | 63.82 ± 7.65 | 60.13 ± 10.14 | 65 ± 5.80 | 0.146M | 0.857 t | 0.110M | 0.131 A |
| Gender (M/F) | 10/14 | 11/5 | 19/0 | 0.093 C | <0.0001C**** | 0.0085 C** | 0.0003 C*** |
| Female sex (%) | 14 (58.33 %) | 5 (31. 25 %) | 0 (0 %) | -- | -- | -- | -- |
| Male sex (%) | 10 (41.66 %) | 11 (68.75 %) | 19 (100 %) | -- | -- | -- | -- |
| BMI (kg/cm2) | 25.2 ± 2.5 | 27.5 ± 5.98 | 26.89 ± 4 | 0.137 t | 0.151 t | 0.721 t | 0.261 A |
| Co-morbidities |  |  |  |  |  |  |  |
| Hypertension (%) | 4 (17 %) | 6 (37.5 %) | 12 (63.16 %) | 0.159 F | 0.004 F** | 0.181 F | 0.0074 C** |
| Dyslipidemia (%) | 0 (0%) | 1 (6.25 %) | 3 (15.79 %) | 0.4 F | 0.079 F | 0.608 F | 0.123 C |
| Smoking (%) | 0 (0%) | 13 (81.25 %) | 6 (31.58 %) | <0.0001 F **** | 0.005 F** | 0.006 F** | <0.0001 C**** |
| Digestive symptoms | 4 (17 %) | 4 (25 %) | 4 (21.05 %) | 0.691 F | >0.9999 F | >0.9999 F | 0.811 C |
| Liver functions |  |  |  |  |  |  |  |
| AST (U/L) | NA | 54.94 ± 28.10 | 58.95 ± 38.23 | -- | -- | 0.980 M | -- |
| ALT (U/L) | NA | 90.63 ± 223.14 | 34.79 ± 17.01 | -- | -- | 0.838 M | -- |
| GGT (U/L) | NA | 192.88 ± 305.55 | 267.21 ± 377.53 | -- | -- | 0.282 M | -- |
| TBIL (umoI/L) | NA | 36.51 ± 56.06 | 25.28 ± 15.04 | -- | -- | 0.898 M | -- |
| ALP (U/L) | NA | 154.13 ± 60.59 | 177 ± 96.64 | -- | -- | 0.574 M | -- |
| Serum albumin (g/L) | NA | 33.48 ± 6.36 | 34.91 ± 4.96 | -- | -- | 0.482 t | -- |
| Routine tests |  |  |  |  |  |  |  |
| Prothrombin time (%) | NA | 67.93 ± 22.49 | 74.35 ± 18.13 | -- | -- | 0.379 t | -- |
| PLT count (g/L) | NA | 149.75 ± 82.22 | 163.72 ± 87.21 | -- | -- | 0.664 M | -- |
| Serum creatinine (umoI/L) | NA | 81.13 ± 28.55 | 68.71 ± 15.00 | -- | -- | 0.208 M | -- |
| Complications |  |  |  |  |  |  |  |
| Ascites | 0 (0%) | 6 (37.5 %) | 6 (31.58 %) | -- | -- | 0.736 F | -- |
| Encephalopathy | 0 (0%) | 7 (43.75 %) | 4 (21.05 %) | -- | -- | 0.273 F | -- |
| Cirrhosis | 0 (0%) | 14 (87.5 %) | 19 (100%) | -- | -- | 0.202 F | -- |
| CTP-A | 0 (0%) | 8 (50 %) | 11 (57.89 %) | -- | -- | 0.740 F | -- |
| CTP-B | 0 (0%) | 7 (43.75 %) | 8 (42.11 %) | -- | -- | >0.9999 F | -- |
| CTP-C | 0 (0%) | 1 (6.25 %) | 0 (0%) | -- | -- | 0.457 F | -- |

Continuous variables were expressed as means ± standard deviation. BMI: Body mass index; ALT: Alanine aminotransferase; AST: Aspartate aminotransferase; GGT: Gamma-glutamyltransferase; TBIL: Total bilirubin; PLT: Platelets; ALP: Alkaline phosphatase; CTP: Child-Turcotte-Pugh score; ALD: Alcoholic liver disease; HCC: hepatocellular carcinoma; *P*1: Comparisons between ALD-NoHCC and controls groups; *P*2: Comparison between ALD-HCC and controls groups; *P*3: Comparison between ALD-HCC and ALD-NoHCC groups; *P*4: Comparisons among all groups; M: Mann-Whitney U test; t: Unpaired *t-test*; A: ANOVA statistical test; C: Chi-square test and F: Fisher's exact test. ** *p* < 0.05, *** *p* < 0.001, **** *p* < 0.0001. NA: not available.

**Supplementary Table 2. Genetic distance between 6 strains of *Thomasclavelia ramosa* isolated in this study**

|  | **Q9779** | **Q9705** | **QA0118** | **QA0117** | **Q9849** | **QA0666** |
| --- | --- | --- | --- | --- | --- | --- |
| **Q9779** |  | 6244 | 4784 | 5496 | 4292 | 4955 |
| **Q9705** |  |  | 5521 | 5891 | 5458 | 5750 |
| **QA0118** |  |  |  | 4609 | 4725 | 5123 |
| **QA0117** |  |  |  |  | 4466 | 4708 |
| **Q9849** |  |  |  |  |  | 5158 |
| **QA0666** |  |  |  |  |  |  |

Number in each cells represented the number of single nucleotide polymorphisms (SNPs).

**Supplementary Figures**

**Supplementary Figure. 1 Flowchart of the subjects included in the study.**


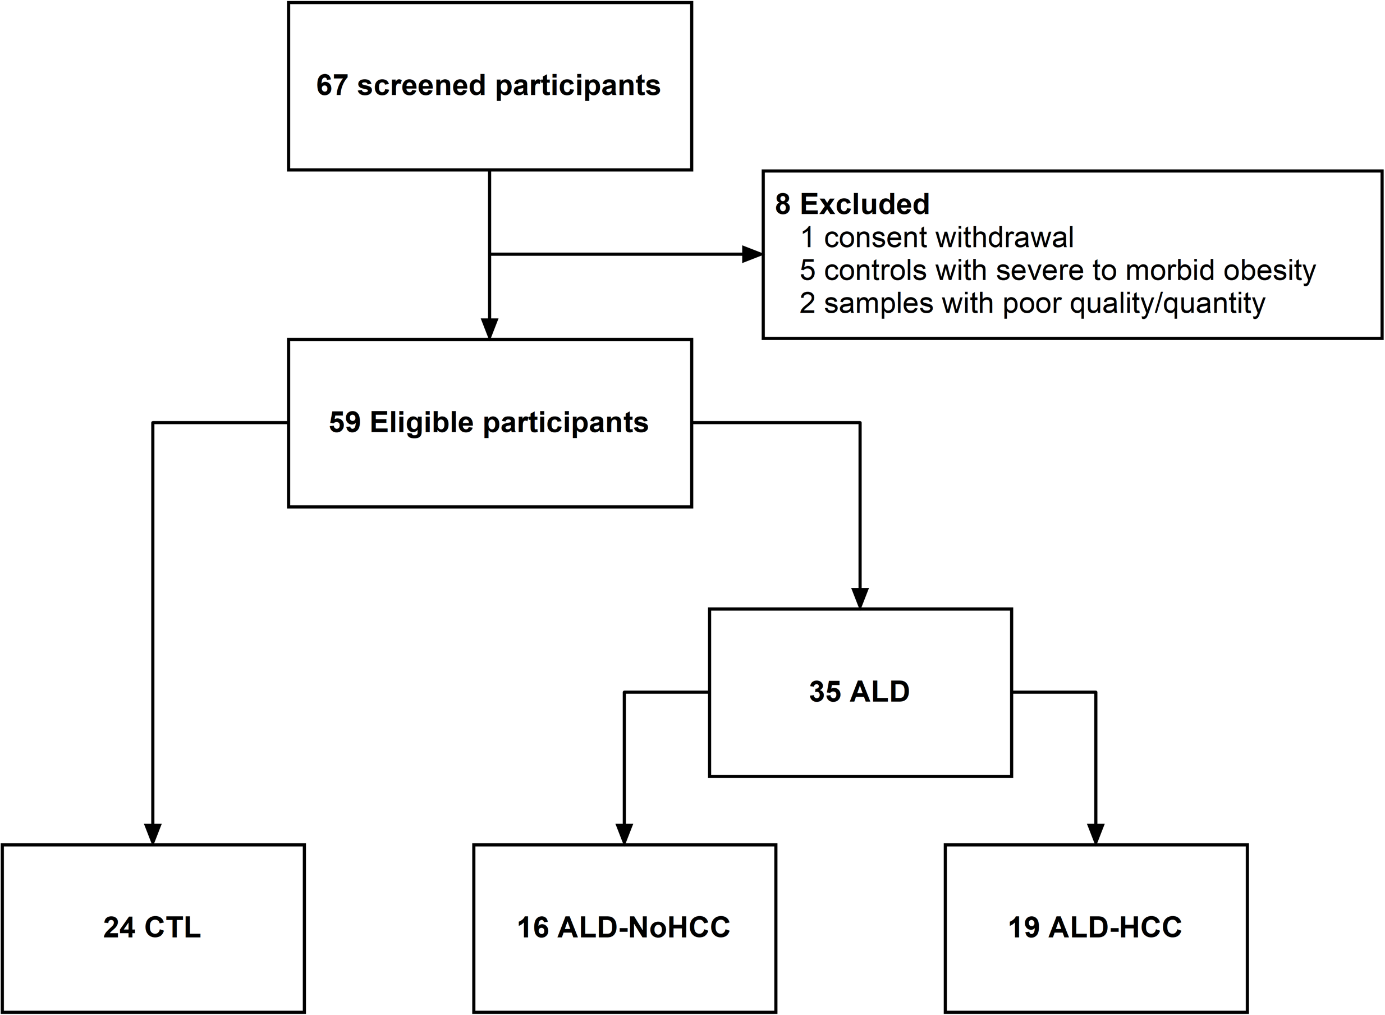


ALD: Alcoholic liver disease; CTL: Controls; HCC: Hepatocellular carcinoma.

**Supplementary Figure 2. Pangenomic analysis of the 6 *Thomasclavelia ramosa* strains isolated in this study**


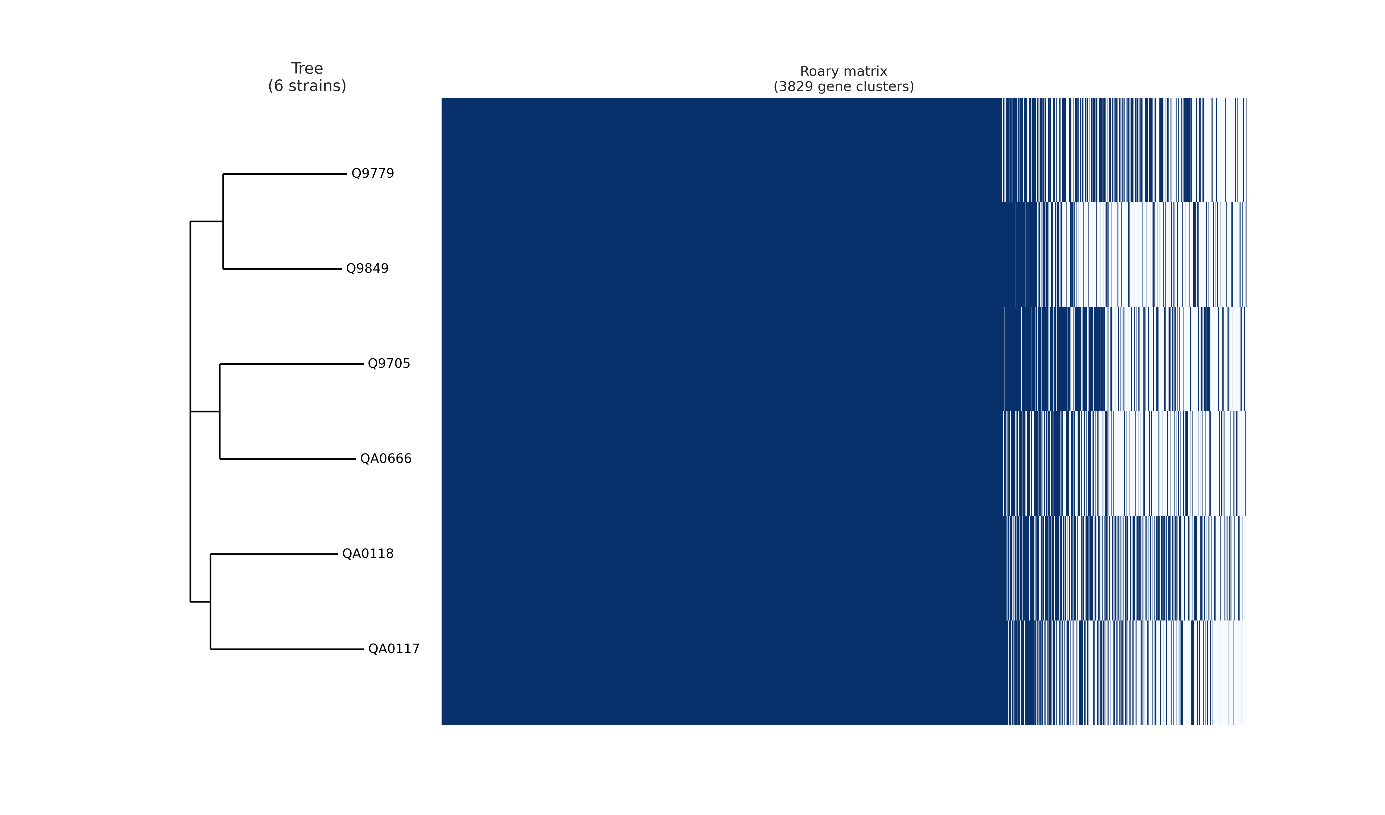


The six strains isolated from six patients evidenced genomic heterogeneity and don’t favor a clonal complex associated with liver cancer.
